# Supplementary material
Source: publisher figshare collection journal article supplement (https://tandf.figshare.com/ndownloader/files/38312037)
Supplement: Supplementary file 1 [file 38312037]

**Supplementary Material**


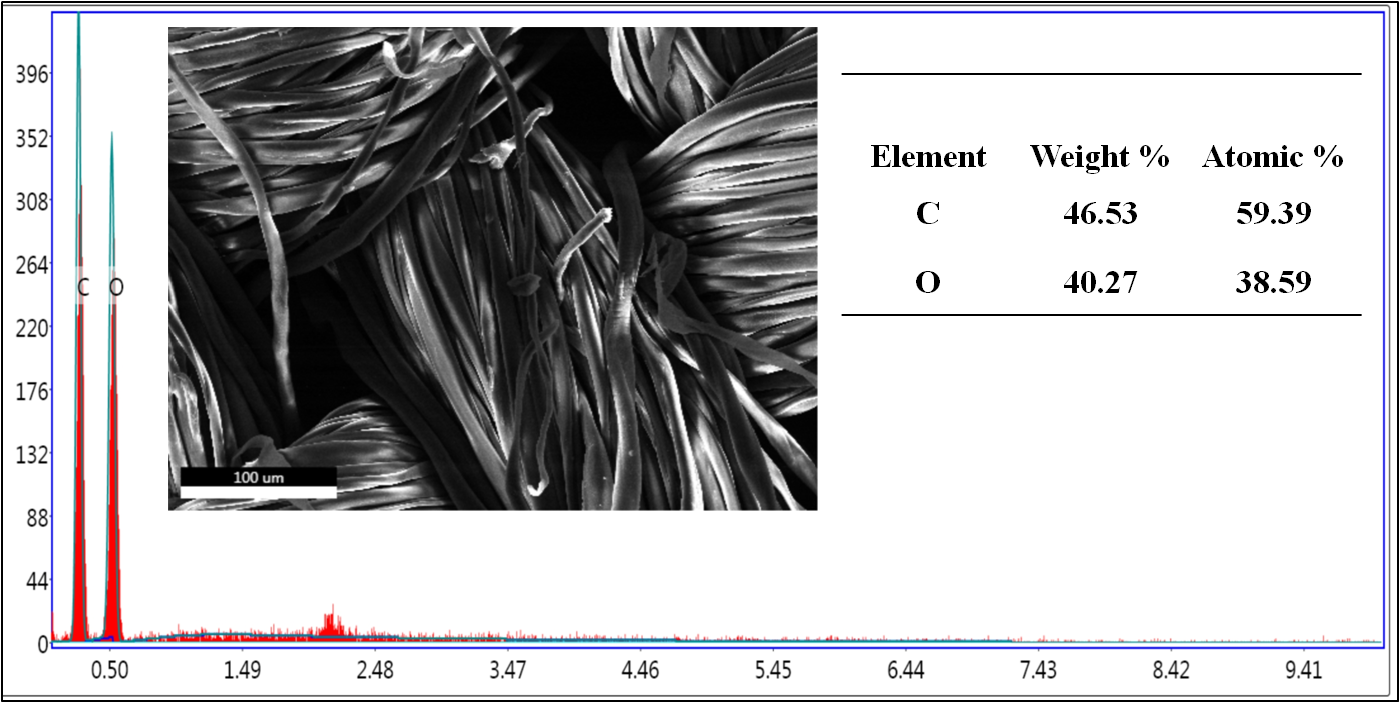


**Fig. S1. EDX Analysis of pure cotton fabric**.


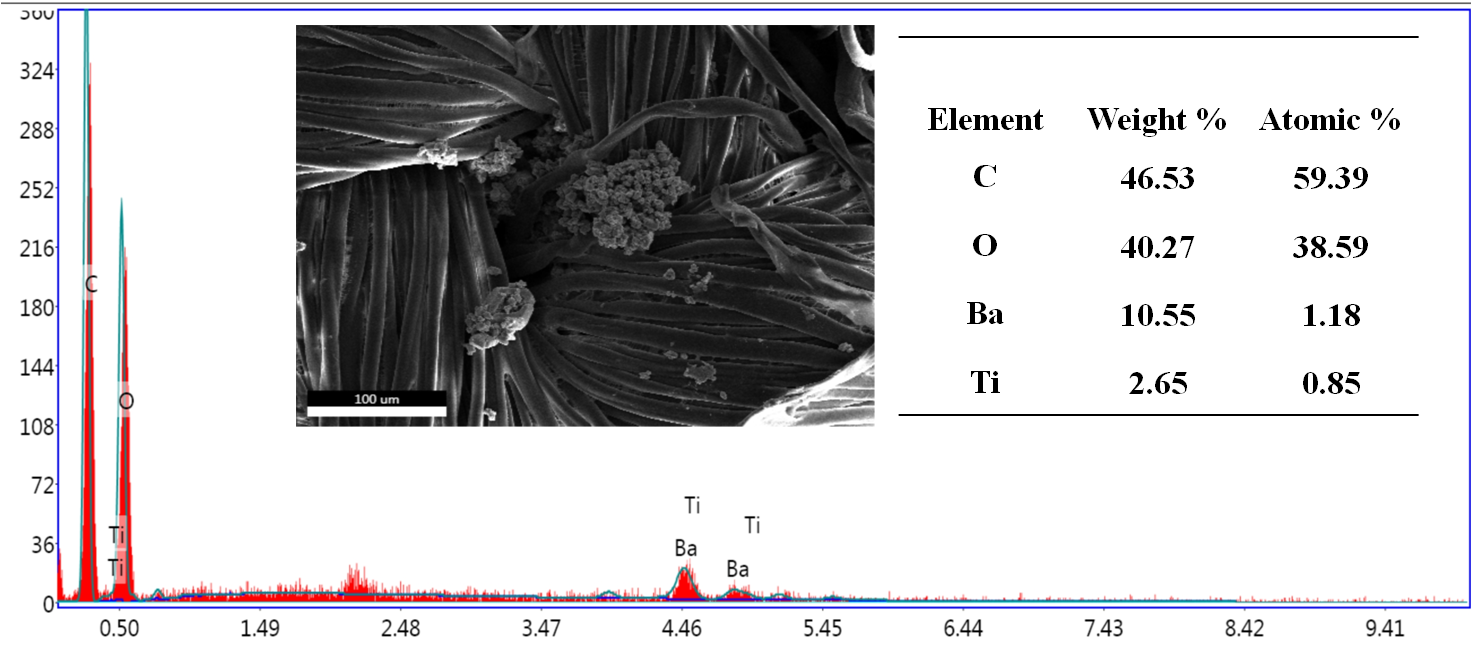


**Fig. S2. EDX Analysis of 20% BT coated cotton fabric after 20 washing.**
